# Supplementary material
Source: PubMed Central journal article supplement (PMC3055584)

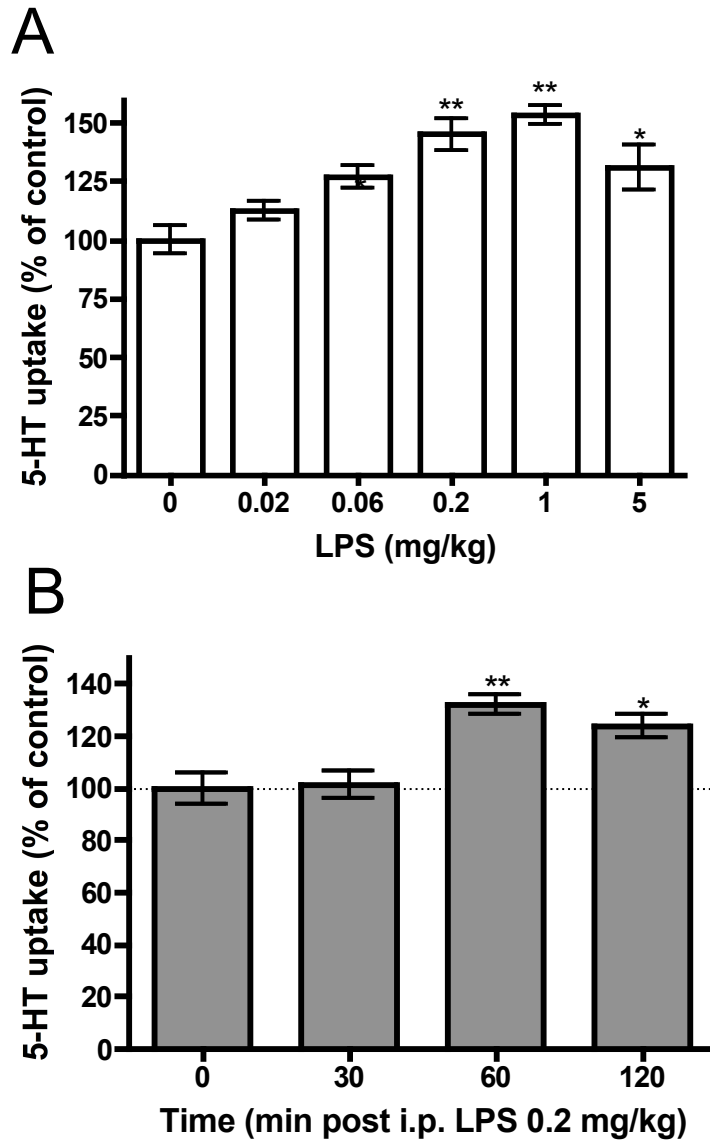

Fig S1

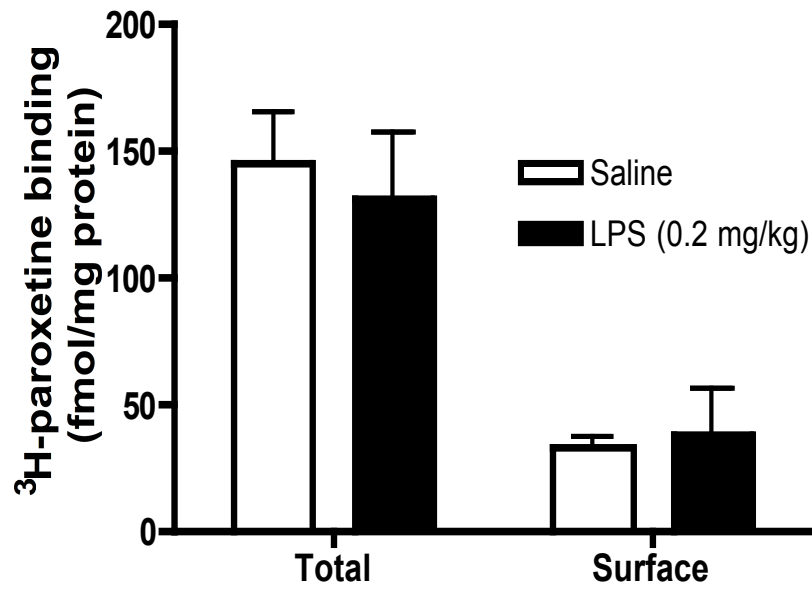

Fig S2

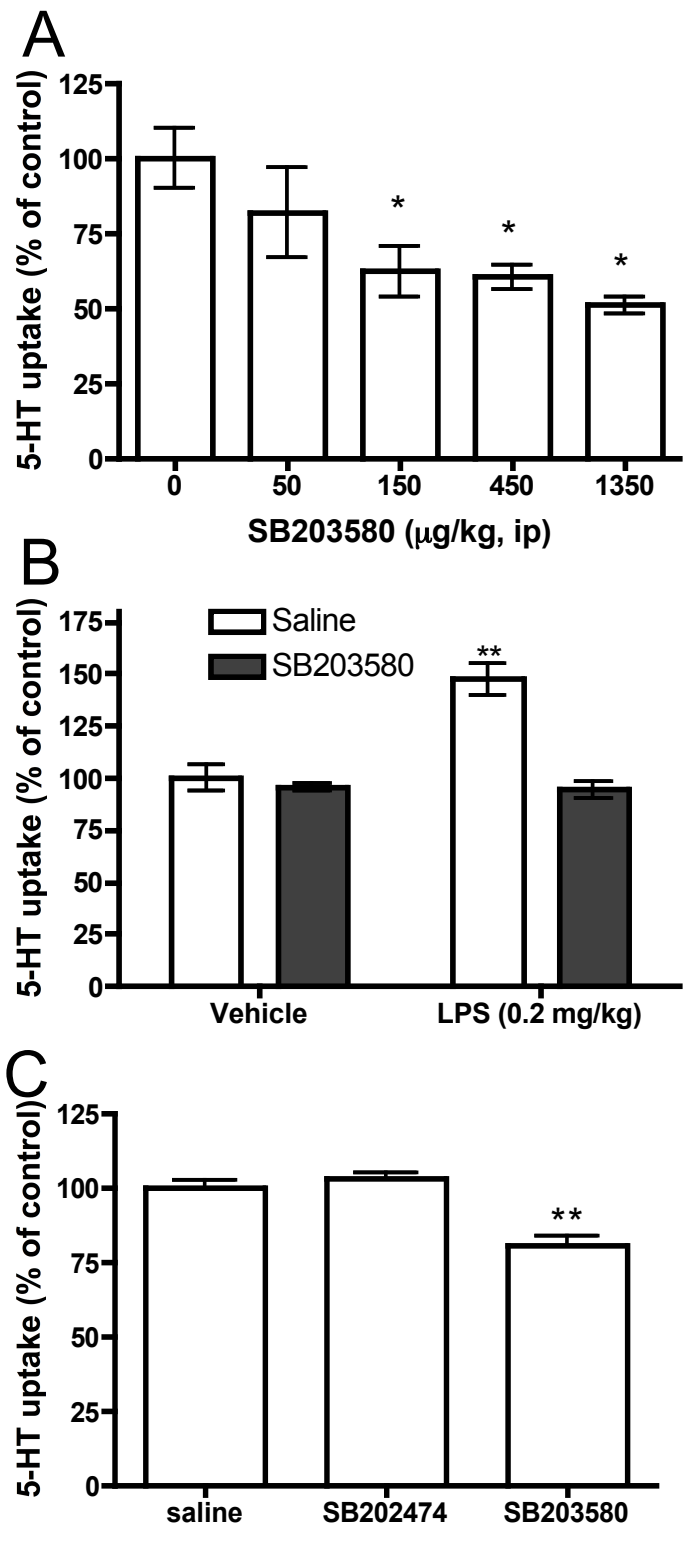

Fig S3

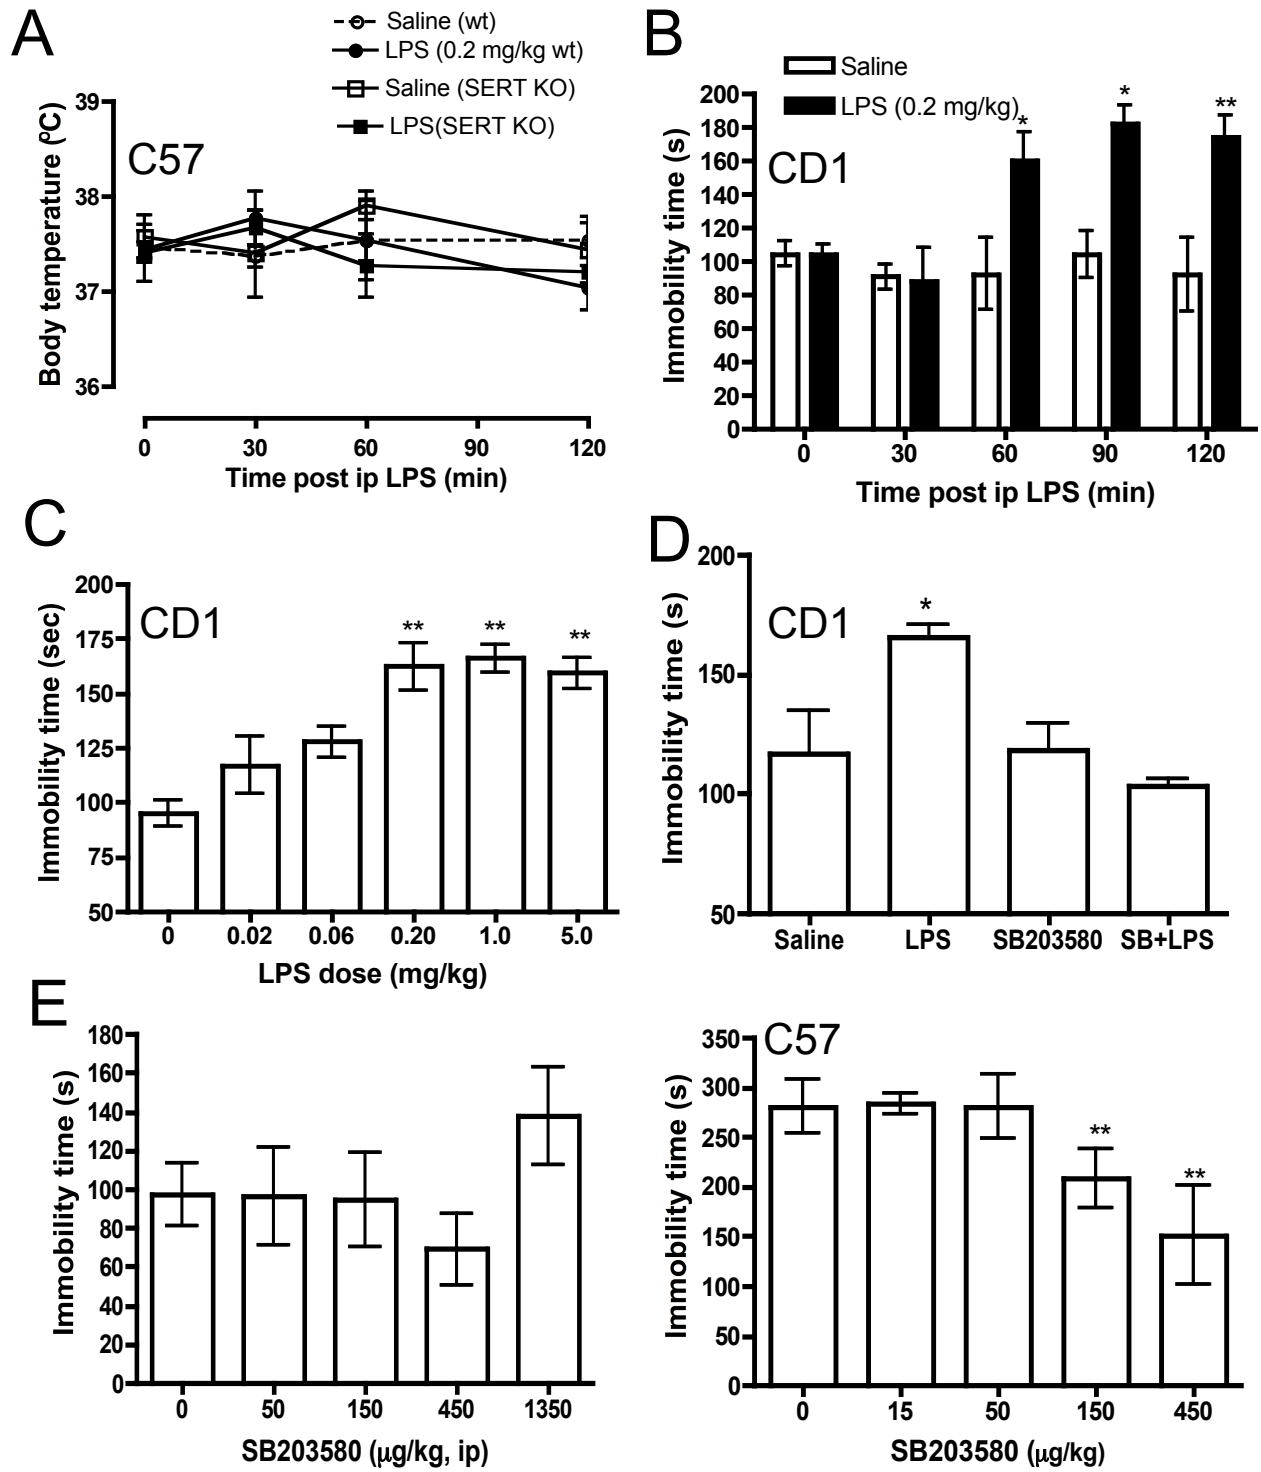

Fig S4

Supplement: npp2010116x1.pdf [file npp2010116x1.pdf]
